# Supplementary material
Source: publisher figshare collection journal article supplement (https://gsajournals.figshare.com/ndownloader/files/12725156)
Supplement: Supplementary file 1 [file 12725156]

## Sheet: Table S5-AfterRacon
Table S6: Assembly statistics and BUSCO scores for all genomes after polishing with Racon up to 4 times.
					Assembly Statistics						BUSCO Scores
Species	Assembly Name	Racon Runs	Pilon Runs		Assembly Size (bp)	Contigs	N50 (bp)	Contigs >100Kb	Contigs >1Mb		Complete (%)	Complete and Single Copy (%)	Complete and duplicated (%)	Fragmented (%)	Missing (%)	BUSCOs Tested
Dana	Dana.pass.miniasm.racon.x1.fasta	1	0		189234428	371	2611025	147	44		88.3	87.4	0.9	7	4.7	978
Dana	Dana.pass.miniasm.racon.x2.fasta	2	0		189285453	371	2612170	147	44		91.6	90.6	1	4.8	3.6	978
Dana	Dana.pass.miniasm.racon.x3.fasta	3	0		189303784	371	2612537	147	44		91.6	90.6	1	4.5	3.9	978
Dana	Dana.pass.miniasm.racon.x4.fasta	4	0		189315877	371	2612889	147	44		91.6	90.5	1.1	4.4	4	978
Dbia	Dbia.pass.miniasm.racon.x1.fasta	1	0		182882016	666	2793476	222	31		88.3	87.5	0.8	7.7	4	978
Dbia	Dbia.pass.miniasm.racon.x2.fasta	2	0		182811833	661	2793423	222	31		91.5	90.7	0.8	5.5	3	978
Dbia	Dbia.pass.miniasm.racon.x3.fasta	3	0		182765320	661	2793585	222	31		91.9	90.6	1.3	5.3	2.8	978
Dbia	Dbia.pass.miniasm.racon.x4.fasta	4	0		182722559	661	2793735	222	31		92	90.8	1.2	5	3	978
Dbip	Dbip.pass.miniasm.racon.x1.fasta	1	0		163588498	570	566858	356	26		74.9	73.9	1	13.2	11.9	978
Dbip	Dbip.pass.miniasm.racon.x2.fasta	2	0		163729450	570	567126	356	26		78.8	78.2	0.6	10.8	10.4	978
Dbip	Dbip.pass.miniasm.racon.x3.fasta	3	0		163754056	570	567154	356	27		79.9	79.1	0.8	9.8	10.3	978
Dbip	Dbip.pass.miniasm.racon.x4.fasta	4	0		163750392	570	567181	356	27		80.1	79	1.1	9.6	10.3	978
Dere	Dere.pass.miniasm.racon.x1.fasta	1	0		130266997	58	16973159	29	21		89.9	89.3	0.6	6.2	3.9	978
Dere	Dere.pass.miniasm.racon.x2.fasta	2	0		130313365	58	16976826	29	21		91.8	91.4	0.4	4.6	3.6	978
Dere	Dere.pass.miniasm.racon.x3.fasta	3	0		130332926	58	16978543	29	21		91.3	90.5	0.8	5.1	3.6	978
Dere	Dere.pass.miniasm.racon.x4.fasta	4	0		130338970	58	16978686	29	21		90.4	90.2	0.2	6.1	3.5	978
Deug	Deug.pass.miniasm.racon.x1.fasta	1	0		159605700	547	1009751	260	43		82.6	82.1	0.5	10.4	7	978
Deug	Deug.pass.miniasm.racon.x2.fasta	2	0		159715408	546	1011318	260	43		84.7	83.8	0.9	9.4	5.9	978
Deug	Deug.pass.miniasm.racon.x3.fasta	3	0		159718572	546	1011595	260	43		85	83.9	1.1	8	7	978
Deug	Deug.pass.miniasm.racon.x4.fasta	4	0		159698468	546	1011350	260	43		86.7	86.1	0.6	7.9	5.4	978
Dtriauraria	Dtriauraria.pass.miniasm.racon.x1.fasta	1	0		173380011	482	741165	342	35		82.9	81.6	1.3	7.9	9.2	978
Dtriauraria	Dtriauraria.pass.miniasm.racon.x2.fasta	2	0		173482526	482	742008	342	35		84.7	82.8	1.9	7.3	8	978
Dtriauraria	Dtriauraria.pass.miniasm.racon.x3.fasta	3	0		173502851	482	742347	342	35		85.5	84	1.5	7	7.5	978
Dtriauraria	Dtriauraria.pass.miniasm.racon.x4.fasta	4	0		173495028	482	742456	342	35		85	83.1	1.9	7.6	7.4	978
Dmau	Dmau.pass.miniasm.racon.x1.fasta	1	0		133964127	272	4727420	65	28		91	90.3	0.7	5.7	3.3	978
Dmau	Dmau.pass.miniasm.racon.x2.fasta	2	0		133978151	270	4728461	65	28		93.6	92.8	0.8	3.9	2.5	978
Dmau	Dmau.pass.miniasm.racon.x3.fasta	3	0		133958743	266	4728800	65	28		94.7	94.1	0.6	2.7	2.6	978
Dmau	Dmau.pass.miniasm.racon.x4.fasta	4	0		133935337	265	4728636	65	28		94.6	93.9	0.7	3.1	2.3	978
Dmoj	Dmoj.pass.miniasm.racon.x1.fasta	1	0		167961763	122	5216854	89	40		82.5	81	1.5	9.8	7.7	978
Dmoj	Dmoj.pass.miniasm.racon.x2.fasta	2	0		168109005	122	5220329	89	40		89.1	87.8	1.3	5.6	5.3	978
Dmoj	Dmoj.pass.miniasm.racon.x3.fasta	3	0		168151829	122	5220785	89	40		89.4	88	1.4	5.3	5.3	978
Dmoj	Dmoj.pass.miniasm.racon.x4.fasta	4	0		168169299	122	5221184	89	40		88.7	86.9	1.8	5.6	5.7	978
Dper	Dper.pass.miniasm.racon.x1.fasta	1	0		164506016	415	3435302	145	34		80.3	79.4	0.9	10.8	8.9	978
Dper	Dper.pass.miniasm.racon.x2.fasta	2	0		164446309	415	3435426	145	34		85.1	83.2	1.9	7.5	7.4	978
Dper	Dper.pass.miniasm.racon.x3.fasta	3	0		164402138	415	3435590	144	34		84.9	83.3	1.6	7.9	7.2	978
Dper	Dper.pass.miniasm.racon.x4.fasta	4	0		164356678	414	3435582	144	34		85.3	83.7	1.6	7.7	7	978
Dpse	Dpse.pass.miniasm.racon.x1.fasta	1	0		159382384	361	2986395	142	33		84.1	82.8	1.3	8.8	7.1	978
Dpse	Dpse.pass.miniasm.racon.x2.fasta	2	0		159345477	361	2986714	142	33		87.7	86.3	1.4	6.4	5.9	978
Dpse	Dpse.pass.miniasm.racon.x3.fasta	3	0		159312422	361	2986724	142	33		88.9	88	0.9	6	5.1	978
Dpse	Dpse.pass.miniasm.racon.x4.fasta	4	0		159275827	361	2986759	142	33		88.8	87.5	1.3	5.8	5.4	978
Dsec	Dsec.pass.miniasm.racon.x1.fasta	1	0		137738422	109	7677148	59	23		91.3	90.2	1.1	4.9	3.8	978
Dsec	Dsec.pass.miniasm.racon.x2.fasta	2	0		137820204	109	7682210	59	23		92.8	91.9	0.9	4.4	2.8	978
Dsec	Dsec.pass.miniasm.racon.x3.fasta	3	0		137841702	109	7683309	59	23		93.1	92	1.1	3.5	3.4	978
Dsec	Dsec.pass.miniasm.racon.x4.fasta	4	0		137851511	108	7684305	59	23		92.1	91.2	0.9	4.5	3.4	978
Dsim	Dsim.pass.miniasm.racon.x1.fasta	1	0		133602479	76	7750648	61	24		91.3	90	1.3	5.2	3.5	978
Dsim	Dsim.pass.miniasm.racon.x2.fasta	2	0		133633664	76	7751127	61	24		94.2	92.9	1.3	3.1	2.7	978
Dsim	Dsim.pass.miniasm.racon.x3.fasta	3	0		133646976	76	7751528	61	24		95.3	94.1	1.2	2.6	2.1	978
Dsim	Dsim.pass.miniasm.racon.x4.fasta	4	0		133655430	76	7751426	61	24		95.6	94.5	1.1	2.2	2.2	978
Dvir	Dvir.pass.miniasm.racon.x1.fasta	1	0		169341059	141	4156756	83	40		84.9	84.2	0.7	8.6	6.5	978
Dvir	Dvir.pass.miniasm.racon.x2.fasta	2	0		169430415	141	4158819	83	40		87.5	86.5	1	7.1	5.4	978
Dvir	Dvir.pass.miniasm.racon.x3.fasta	3	0		169449856	141	4159224	83	40		89.5	88.2	1.3	5.3	5.2	978
Dvir	Dvir.pass.miniasm.racon.x4.fasta	4	0		169448282	141	4159275	83	40		89.3	88.1	1.2	5.5	5.2	978
Dwil	Dwil.pass.miniasm.racon.x1.fasta	1	0		196059495	490	1524869	268	49		79.7	78.4	1.3	13.5	6.8	978
Dwil	Dwil.pass.miniasm.racon.x2.fasta	2	0		196100155	489	1524350	269	49		84.4	82.9	1.5	9.6	6	978
Dwil	Dwil.pass.miniasm.racon.x3.fasta	3	0		196103532	489	1523838	269	49		84.5	83.3	1.2	9.5	6	978
Dwil	Dwil.pass.miniasm.racon.x4.fasta	4	0		196094697	489	1523992	268	49		82.8	81.7	1.1	10.1	7.1	978
Dyak	Dyak.pass.miniasm.racon.x1.fasta	1	0		143021842	111	5218344	68	34		86.7	86.2	0.5	8.6	4.7	978
Dyak	Dyak.pass.miniasm.racon.x2.fasta	2	0		143070667	111	5219333	68	34		90.2	89.7	0.5	6.2	3.6	978
Dyak	Dyak.pass.miniasm.racon.x3.fasta	3	0		143092062	111	5220030	68	34		90.8	90	0.8	5.6	3.6	978
Dyak	Dyak.pass.miniasm.racon.x4.fasta	4	0		143102601	111	5220296	68	34		91.2	90.7	0.5	5.1	3.7	978
